# Supplementary material for: A synthetic review of terrestrial biological research from the Alberta oil sands region: 10 years of published literature
Source: PubMed Central journal article supplement — Integr Environ Assess Manag. 2021 Oct 12;18(2):388–406. doi: 10.1002/ieam.4519 (PMC9292629; doi:10.1002/ieam.4519), 2021-10-12
Supplement: IEAM-18-388-s002.pdf [file IEAM-18-388-s002.pdf]

# A synthetic review of terrestrial biological research from the Alberta oil sands region: ten years of published literature

## Supplementary Information – Appendix 2

**Table A2a:** Summary table of mammal distribution responses to anthropogenic disturbance features in the OSR at the local (smaller spatial) scale. To be included in the table, publications had to (1) consider a response variable of mammal abundance or occupancy (i.e. a distribution response); (2) consider specific anthropogenic disturbance (i.e. did not use summary metrics such as % disturbed landscape); (3) not be based on predictive modelling studies (i.e. response metrics had to be based on monitoring data); and (4) present metrics of mammal responses (e.g. explanatory model coefficients) to individual variables.

**Table A2b:** Summary table of mammal distribution responses to anthropogenic disturbance features in the OSR at the landscape (larger spatial) scale. To be included in the table, publications had to (1) consider a response variable of mammal abundance or occupancy (i.e. a distribution response); (2) consider specific anthropogenic disturbance (i.e. did not use summary metrics such as % disturbed landscape); (3) not be based on predictive modelling studies (i.e. response metrics had to be based on monitoring data); and (4) present metrics of mammal responses (e.g. explanatory model coefficients) to individual variables.

**Table A2a:** Summary table of mammal distribution responses to anthropogenic disturbance features in the OSR at the local (smaller spatial) scale. To be included in the table, publications had to (1) consider a response variable of mammal abundance or occupancy (i.e. a distribution response); (2) consider specific anthropogenic disturbance (i.e. did not use summary metrics such as % disturbed landscape); (3) not be based on predictive modelling studies (i.e. response metrics had to be based on monitoring data); and (4) present metrics of mammal responses (e.g. explanatory model coefficients) to individual variables.

|                    |                                            |                 |                        | Coyote ( <i>Canis latrans</i> ) | Red Fox ( <i>Vulpes vulpes</i> ) | Wolf ( <i>Canis lupus</i> ) | Lynx ( <i>Lynx canadensis</i> ) | Snowshoe hare ( <i>Lepus americanus</i> ) | Ermine ( <i>Mustela erminea</i> ) | Fisher ( <i>Pekania pennanti</i> ) | Marten ( <i>Martes americana</i> ) | Mink ( <i>Neovison vison</i> ) | River Otter ( <i>Lontra canadensis</i> ) | Wolverine ( <i>Gulo gulo</i> ) | Red squirrel ( <i>Sciurus vulgaris</i> ) | Caribou ( <i>Rangifer tarandus</i> ) | Deer ( <i>Odocoileus virginianus</i> ) | Moose ( <i>Alces alces</i> ) | Black bear ( <i>Ursus americanus</i> ) |   |   |
|--------------------|--------------------------------------------|-----------------|------------------------|---------------------------------|----------------------------------|-----------------------------|---------------------------------|-------------------------------------------|-----------------------------------|------------------------------------|------------------------------------|--------------------------------|------------------------------------------|--------------------------------|------------------------------------------|--------------------------------------|----------------------------------------|------------------------------|----------------------------------------|---|---|
| Literature review  | Toews et al. 2017                          | Linear          | Trail                  | -                               | -                                | ↑                           | -                               | -                                         | -                                 | -                                  | -                                  | -                              | -                                        | -                              | -                                        | -                                    | ↑                                      | ↓                            | -                                      |   |   |
|                    |                                            |                 | Seismic                | ↑                               | -                                | ↑                           | -                               | -                                         | -                                 | -                                  | -                                  | -                              | -                                        | -                              | -                                        | -                                    | -                                      | ↑                            | ↓                                      | - |   |
|                    |                                            |                 | Pipeline               | ↑                               | -                                | ↑                           | -                               | -                                         | -                                 | -                                  | -                                  | -                              | -                                        | -                              | -                                        | -                                    | -                                      | -                            | ↑                                      | ↓ | - |
|                    |                                            |                 | Transmission line      | -                               | -                                | ↑                           | -                               | -                                         | -                                 | -                                  | -                                  | -                              | -                                        | -                              | -                                        | -                                    | -                                      | -                            | ↑                                      | ↓ | - |
| Remote camera      | Tigner et al. 2014<br>Tigner et al. 2015   | Linear          | Open ≤ 2 m             | -                               | -                                | -                           | -                               | -                                         | -                                 | -                                  | 0                                  | -                              | -                                        | -                              | -                                        | -                                    | -                                      | -                            | -                                      | 0 |   |
|                    |                                            |                 | Open 3-4 m             | -                               | -                                | -                           | -                               | -                                         | -                                 | -                                  | -                                  | ↓                              | -                                        | -                              | -                                        | -                                    | -                                      | -                            | -                                      | ↑ |   |
|                    |                                            |                 | Open 5 m               | -                               | -                                | -                           | -                               | -                                         | -                                 | -                                  | -                                  | ↓                              | -                                        | -                              | -                                        | -                                    | -                                      | -                            | -                                      | ↑ |   |
|                    |                                            |                 | Open ≥ 6m              | -                               | -                                | -                           | -                               | -                                         | -                                 | -                                  | -                                  | ↓                              | -                                        | -                              | -                                        | -                                    | -                                      | -                            | -                                      | ↑ |   |
|                    |                                            |                 | Partial ≥ 6m           | -                               | -                                | -                           | -                               | -                                         | -                                 | -                                  | -                                  | 0                              | -                                        | -                              | -                                        | -                                    | -                                      | -                            | -                                      | ↑ |   |
| Snow tracking      | Toews et al. 2017                          | Linear          | Trail                  | 0                               | 0                                | 0                           | -                               | -                                         | -                                 | -                                  | -                                  | -                              | -                                        | -                              | -                                        | -                                    | 0                                      | 0                            | -                                      |   |   |
|                    |                                            |                 | Seismic                | ↑                               | -                                | 0                           | -                               | -                                         | -                                 | -                                  | -                                  | -                              | -                                        | -                              | -                                        | -                                    | -                                      | 0                            | 0                                      | - |   |
|                    |                                            |                 | Pipeline               | 0                               | -                                | 0                           | 0                               | -                                         | -                                 | -                                  | -                                  | -                              | -                                        | -                              | -                                        | -                                    | -                                      | -                            | 0                                      | 0 | - |
|                    |                                            |                 | Transmission line      | 0                               | -                                | 0                           | 0                               | -                                         | -                                 | -                                  | -                                  | -                              | -                                        | -                              | -                                        | -                                    | -                                      | -                            | 0                                      | 0 | - |
|                    |                                            | Polygonal       | Agriculture            | 0                               | -                                | 0                           | 0                               | -                                         | -                                 | -                                  | -                                  | -                              | -                                        | -                              | -                                        | -                                    | -                                      | -                            | 0                                      | 0 | - |
|                    |                                            |                 | Wellsite               | 0                               | -                                | 0                           | 0                               | -                                         | -                                 | -                                  | -                                  | -                              | -                                        | -                              | -                                        | -                                    | -                                      | -                            | 0                                      | 0 | - |
| Scat surveys       | Wasser et al. 2011                         | Linear          | Primary road           | -                               | -                                | 0                           | -                               | -                                         | -                                 | -                                  | -                                  | -                              | -                                        | -                              | -                                        | -                                    | ↓                                      | 0                            | ↓                                      |   |   |
|                    |                                            |                 | Secondary road         | -                               | -                                | 0                           | -                               | -                                         | -                                 | -                                  | -                                  | -                              | -                                        | -                              | -                                        | -                                    | -                                      | ↓                            | 0                                      | ↑ |   |
|                    |                                            |                 | Tertiary road          | -                               | -                                | 0                           | -                               | -                                         | -                                 | -                                  | -                                  | -                              | -                                        | -                              | -                                        | -                                    | -                                      | ↓                            | 0                                      | ↑ |   |
| Telemetry          | Dickie et al. 2017                         | Linear          | Unused / unknown       | -                               | -                                | ↑                           | -                               | -                                         | -                                 | -                                  | -                                  | -                              | -                                        | -                              | -                                        | -                                    | ↑                                      | 0                            | ↓                                      |   |   |
|                    |                                            |                 | Trail                  | -                               | -                                | 0                           | -                               | -                                         | -                                 | -                                  | -                                  | -                              | -                                        | -                              | -                                        | -                                    | -                                      | -                            | -                                      | - |   |
|                    |                                            |                 | Seismic - conventional | -                               | -                                | ↑                           | -                               | -                                         | -                                 | -                                  | -                                  | -                              | -                                        | -                              | -                                        | -                                    | -                                      | -                            | -                                      | - |   |
|                    |                                            |                 | Seismic - low impact   | -                               | -                                | 0                           | -                               | -                                         | -                                 | -                                  | -                                  | -                              | -                                        | -                              | -                                        | -                                    | -                                      | -                            | -                                      | - |   |
|                    |                                            |                 | Pipeline               | -                               | -                                | ↑                           | -                               | -                                         | -                                 | -                                  | -                                  | -                              | -                                        | -                              | -                                        | -                                    | -                                      | -                            | -                                      | - |   |
|                    | Latham et al. 2011a                        | Linear          | Transmission line      | -                               | -                                | ↑                           | -                               | -                                         | -                                 | -                                  | -                                  | -                              | -                                        | -                              | -                                        | -                                    | -                                      | -                            | -                                      | - |   |
|                    |                                            |                 | Road                   | -                               | -                                | ↑                           | -                               | -                                         | -                                 | -                                  | -                                  | -                              | -                                        | -                              | -                                        | -                                    | -                                      | -                            | -                                      | - |   |
|                    |                                            |                 | Polygonal              | -                               | -                                | ↓                           | -                               | -                                         | -                                 | -                                  | -                                  | -                              | -                                        | -                              | -                                        | -                                    | -                                      | -                            | -                                      | - |   |
|                    | Latham et al. 2011b                        | Linear          | Seismic - conventional | -                               | -                                | ↑                           | -                               | -                                         | -                                 | -                                  | -                                  | -                              | -                                        | -                              | -                                        | -                                    | -                                      | -                            | -                                      | ↑ |   |
|                    |                                            |                 | Seismic - low impact   | -                               | -                                | 0                           | -                               | -                                         | -                                 | -                                  | -                                  | -                              | -                                        | -                              | -                                        | -                                    | -                                      | -                            | -                                      | ↑ |   |
| Dickie et al. 2020 | Polygonal                                  | Pipeline        | -                      | -                               | ↓                                | -                           | -                               | -                                         | -                                 | -                                  | -                                  | -                              | -                                        | -                              | -                                        | -                                    | -                                      | -                            | ↑                                      |   |   |
|                    |                                            | Road            | -                      | -                               | ↑                                | -                           | -                               | -                                         | -                                 | -                                  | -                                  | -                              | -                                        | -                              | -                                        | -                                    | -                                      | -                            | ↑                                      |   |   |
| ABMI Models        | ABMI Biodiversity Browser<br>(www.abmi.ca) | Human footprint | Linear density         | -                               | -                                | -                           | -                               | -                                         | -                                 | -                                  | -                                  | -                              | -                                        | -                              | -                                        | -                                    | -                                      | -                            | 0                                      |   |   |
|                    |                                            |                 | Wellsite               | -                               | -                                | -                           | -                               | -                                         | -                                 | -                                  | -                                  | -                              | -                                        | -                              | -                                        | -                                    | -                                      | -                            | -                                      | ↑ |   |
|                    |                                            |                 | Human habitation       | -                               | -                                | -                           | -                               | -                                         | -                                 | -                                  | -                                  | -                              | -                                        | -                              | -                                        | -                                    | -                                      | -                            | -                                      | ↑ |   |
|                    |                                            |                 | Soft linear            | 0                               | ↑                                | 0                           | ↑                               | 0                                         | 0                                 | 0                                  | 0                                  | 0                              | 0                                        | ↓                              | ↓                                        | 0                                    | 0                                      | 0                            | ↑                                      | ↑ |   |
|                    |                                            |                 | Hard linear            | ↑                               | 0                                | ↓                           | ↓                               | 0                                         | 0                                 | 0                                  | ↓                                  | 0                              | 0                                        | ↓                              | ↓                                        | ↓                                    | ↓                                      | ↓                            | ↓                                      | ↓ | ↓ |
| Scat surveys       | Scrafford et al. 2017                      | Linear          | Agriculture            | ↑                               | ↑                                | ↓                           | ↓                               | ↓                                         | 0                                 | ↓                                  | ↓                                  | 0                              | ↓                                        | ↓                              | ↓                                        | ↓                                    | ↓                                      | ↑                            | ↓                                      |   |   |
|                    |                                            |                 | Forestry               | ↑                               | ↓                                | 0                           | 0                               | 0                                         | 0                                 | 0                                  | ↓                                  | 0                              | 0                                        | -                              | -                                        | ↓                                    | ↓                                      | ↓                            | ↓                                      | - |   |
|                    |                                            |                 | Energy                 | ↑                               | ↑                                | ↓                           | ↑                               | ↓                                         | ↓                                 | 0                                  | ↓                                  | 0                              | 0                                        | -                              | -                                        | ↓                                    | ↓                                      | ↑                            | ↑                                      | - |   |
|                    |                                            | Polygonal       | Urban                  | ↑                               | ↑                                | ↓                           | ↓                               | ↓                                         | ↓                                 | ↓                                  | ↓                                  | ↓                              | 0                                        | ↓                              | ↓                                        | ↓                                    | ↓                                      | ↓                            | ↑                                      | ↑ |   |
|                    |                                            |                 | Transportation         | ↑                               | 0                                | ↓                           | ↑                               | 0                                         | 0                                 | ↓                                  | 0                                  | 0                              | 0                                        | -                              | -                                        | ↓                                    | ↓                                      | ↑                            | ↑                                      | - |   |

**Table A2b:** Summary table of mammal distribution responses to anthropogenic disturbance features in the OSR at the landscape (larger spatial) scale. To be included in the table, publications had to (1) consider a response variable of mammal abundance or occupancy (i.e. a distribution response); (2) consider specific anthropogenic disturbance (i.e. did not use summary metrics such as % disturbed landscape); (3) not be based on predictive modelling studies (i.e. response metrics had to be based on monitoring data); and (4) present metrics of mammal responses (e.g. explanatory model coefficients) to individual variables.

|                             |                        |                      |                     | Coyote ( <i>Canis latrans</i> ) | Red Fox ( <i>Vulpes vulpes</i> ) | Wolf ( <i>Canis lupus</i> ) | Lynx ( <i>Lynx canadensis</i> ) | Snowshoe hare ( <i>Lepus americanus</i> ) | Ermine ( <i>Mustela erminea</i> ) | Fisher ( <i>Pekania pennanti</i> ) | Marten ( <i>Martes americana</i> ) | Mink ( <i>Neovison vison</i> ) | River Otter ( <i>Lontra canadensis</i> ) | Wolverine ( <i>Gulo gulo</i> ) | Red squirrel ( <i>Sciurus vulgaris</i> ) | Caribou ( <i>Rangifer tarandus</i> ) | Deer ( <i>Odocoileus virginianus</i> ) | Moose ( <i>Alces alces</i> ) | Black bear ( <i>Ursus americanus</i> ) |   |   |   |   |
|-----------------------------|------------------------|----------------------|---------------------|---------------------------------|----------------------------------|-----------------------------|---------------------------------|-------------------------------------------|-----------------------------------|------------------------------------|------------------------------------|--------------------------------|------------------------------------------|--------------------------------|------------------------------------------|--------------------------------------|----------------------------------------|------------------------------|----------------------------------------|---|---|---|---|
| Literature review           | Toews et al. 2017      | Linear               | Trail               | -                               | -                                | ↑                           | -                               | -                                         | -                                 | -                                  | -                                  | -                              | -                                        | -                              | -                                        | -                                    | -                                      | -                            | -                                      | - |   |   |   |
|                             |                        |                      | Seismic             | ↑                               | -                                | ↑                           | -                               | -                                         | -                                 | -                                  | -                                  | -                              | -                                        | -                              | -                                        | -                                    | -                                      | -                            | ↑                                      | ↑ | - | - |   |
|                             |                        |                      | Pipeline            | ↑                               | -                                | ↓                           | -                               | -                                         | -                                 | -                                  | -                                  | -                              | -                                        | -                              | -                                        | -                                    | -                                      | -                            | -                                      | - | - | - | - |
|                             |                        |                      | Transmission line   | -                               | -                                | ↓                           | -                               | -                                         | -                                 | -                                  | -                                  | -                              | -                                        | -                              | -                                        | -                                    | -                                      | -                            | -                                      | - | - | - | - |
|                             |                        |                      | Road                | ↑                               | -                                | ↓                           | ↓                               | -                                         | -                                 | -                                  | -                                  | -                              | -                                        | -                              | -                                        | -                                    | -                                      | -                            | -                                      | ↑ | ↑ | - | - |
|                             |                        | Polygonal            | Agriculture         | ↑                               | -                                | 0                           | ↓                               | -                                         | -                                 | -                                  | -                                  | -                              | -                                        | -                              | -                                        | -                                    | -                                      | -                            | -                                      | - | - | - | - |
|                             |                        |                      | Wellsite            | ↑                               | -                                | ↓                           | -                               | -                                         | -                                 | -                                  | -                                  | -                              | -                                        | -                              | -                                        | -                                    | -                                      | -                            | -                                      | ↓ | - | - | - |
|                             |                        |                      | Cutblock (≤ 10 yr)  | ↓                               | -                                | ↑                           | ↓                               | -                                         | -                                 | -                                  | -                                  | -                              | -                                        | -                              | -                                        | -                                    | -                                      | -                            | -                                      | ↑ | ↓ | - | - |
|                             |                        |                      | Cutblock (10-40 yr) | ↑                               | -                                | ↓                           | ↑                               | -                                         | -                                 | -                                  | -                                  | -                              | -                                        | -                              | -                                        | -                                    | -                                      | -                            | -                                      | ↓ | ↑ | - | - |
|                             |                        |                      | Cutblock (> 40 yr)  | ↓                               | -                                | ↓                           | ↑                               | -                                         | -                                 | -                                  | -                                  | -                              | -                                        | -                              | -                                        | -                                    | -                                      | -                            | -                                      | ↑ | ↑ | - | - |
| Total Anthro                |                        |                      | ↑                   | -                               | ↓                                | ↓                           | -                               | -                                         | -                                 | -                                  | -                                  | -                              | -                                        | -                              | -                                        | -                                    | -                                      | ↑                            | ↑                                      | - | - |   |   |
| Remote camera               | Fisher and Burton 2018 | Linear               | Trail               | 0                               | 0                                | ↑                           | ↑                               | 0                                         | -                                 | ↓                                  | -                                  | -                              | -                                        | -                              | ↑                                        | -                                    | ↓                                      | ↓                            | 0                                      | 0 |   |   |   |
|                             |                        |                      | 3D Seismic          | ↑                               | ↓                                | 0                           | ↑                               | ↑                                         | -                                 | ↓                                  | -                                  | -                              | -                                        | -                              | ↑                                        | -                                    | 0                                      | ↑                            | ↓                                      | ↓ | ↓ |   |   |
|                             |                        |                      | Seismic             | 0                               | 0                                | 0                           | 0                               | ↑                                         | -                                 | 0                                  | -                                  | -                              | -                                        | -                              | 0                                        | -                                    | 0                                      | 0                            | 0                                      | 0 | 0 |   |   |
|                             |                        |                      | Cutline             | ↑                               | ↓                                | 0                           | 0                               | 0                                         | -                                 | 0                                  | -                                  | -                              | -                                        | -                              | 0                                        | -                                    | ↓                                      | ↓                            | 0                                      | 0 | 0 |   |   |
|                             |                        |                      | Pipeline            | ↓                               | 0                                | 0                           | ↓                               | 0                                         | -                                 | ↑                                  | -                                  | -                              | -                                        | -                              | 0                                        | -                                    | 0                                      | ↓                            | 0                                      | 0 | 0 |   |   |
|                             |                        |                      | Road                | ↑                               | 0                                | ↓                           | ↑                               | 0                                         | -                                 | 0                                  | -                                  | -                              | -                                        | -                              | ↑                                        | -                                    | 0                                      | 0                            | 0                                      | ↓ | ↓ |   |   |
|                             |                        | Polygonal            | Wellsite            | 0                               | ↓                                | 0                           | ↓                               | 0                                         | -                                 | 0                                  | -                                  | -                              | -                                        | -                              | ↓                                        | -                                    | ↑                                      | ↓                            | 0                                      | 0 | 0 |   |   |
|                             |                        |                      | Block               | ↓                               | ↑                                | ↑                           | 0                               | 0                                         | -                                 | 0                                  | -                                  | -                              | -                                        | -                              | 0                                        | -                                    | ↑                                      | ↑                            | ↓                                      | ↓ | ↓ |   |   |
|                             |                        |                      | Cutblock            | 0                               | 0                                | 0                           | ↑                               | ↓                                         | -                                 | 0                                  | -                                  | -                              | -                                        | -                              | 0                                        | -                                    | ↑                                      | ↑                            | 0                                      | 0 | 0 |   |   |
|                             |                        | Total Anthro         |                     |                                 | ↑                                | ↓                           | ↑                               | ↑                                         | ↑                                 | -                                  | ↓                                  | -                              | -                                        | -                              | ↑                                        | -                                    | ↑                                      | ↓                            | ↓                                      | ↓ | ↓ |   |   |
| Fisher et al. 2020 (annual) | Linear                 | Trail                | -                   | -                               | -                                | -                           | -                               | -                                         | -                                 | -                                  | -                                  | -                              | -                                        | -                              | -                                        | -                                    | ↓                                      | -                            | -                                      | - |   |   |   |
|                             |                        | 3D Seismic           | -                   | -                               | -                                | -                           | -                               | -                                         | -                                 | -                                  | -                                  | -                              | -                                        | -                              | -                                        | -                                    | 0                                      | -                            | -                                      | - |   |   |   |
|                             |                        | Seismic              | -                   | -                               | -                                | -                           | -                               | -                                         | -                                 | -                                  | -                                  | -                              | -                                        | -                              | -                                        | -                                    | 0                                      | -                            | -                                      | - |   |   |   |
|                             |                        | Cutline              | -                   | -                               | -                                | -                           | -                               | -                                         | -                                 | -                                  | -                                  | -                              | -                                        | -                              | -                                        | -                                    | 0                                      | -                            | -                                      | - |   |   |   |
|                             |                        | Pipeline             | -                   | -                               | -                                | -                           | -                               | -                                         | -                                 | -                                  | -                                  | -                              | -                                        | -                              | -                                        | -                                    | 0                                      | -                            | -                                      | - |   |   |   |
|                             |                        | Road                 | -                   | -                               | -                                | -                           | -                               | -                                         | -                                 | -                                  | -                                  | -                              | -                                        | -                              | -                                        | -                                    | 0                                      | -                            | -                                      | - |   |   |   |
|                             | Polygonal              | Wellsite             | -                   | -                               | -                                | -                           | -                               | -                                         | -                                 | -                                  | -                                  | -                              | -                                        | -                              | -                                        | -                                    | ↑                                      | -                            | -                                      | - |   |   |   |
|                             |                        | Block                | -                   | -                               | -                                | -                           | -                               | -                                         | -                                 | -                                  | -                                  | -                              | -                                        | -                              | -                                        | -                                    | ↑                                      | -                            | -                                      | - |   |   |   |
|                             |                        | Cutblock             | -                   | -                               | -                                | -                           | -                               | -                                         | -                                 | -                                  | -                                  | -                              | -                                        | -                              | -                                        | -                                    | ↑                                      | -                            | -                                      | - |   |   |   |
|                             | Total Anthro           |                      |                     | -                               | -                                | -                           | -                               | -                                         | -                                 | -                                  | -                                  | -                              | -                                        | -                              | -                                        | -                                    | ↑                                      | -                            | -                                      | - |   |   |   |
| Tattersall et al. 2019      | Linear                 | Seismic line density | ↑                   | -                               | -                                | ↑                           | -                               | -                                         | -                                 | -                                  | -                                  | -                              | -                                        | -                              | -                                        | -                                    | -                                      | -                            | ↓                                      |   |   |   |   |
| Tigner et al. 2014, 2015    | Linear                 | Seismic line density | -                   | -                               | -                                | -                           | -                               | -                                         | -                                 | ↓                                  | -                                  | -                              | -                                        | -                              | -                                        | -                                    | -                                      | -                            | 0                                      |   |   |   |   |

Continued on next page...

...Continued from previous page

|                   |                   |                     | Coyote ( <i>Canis latrans</i> ) | Red Fox ( <i>Vulpes vulpes</i> ) | Wolf ( <i>Canis lupus</i> ) | Lynx ( <i>Lynx canadensis</i> ) | Snowshoe hare ( <i>Lepus americanus</i> ) | Ermine ( <i>Mustela erminea</i> ) | Fisher ( <i>Pekania pennanti</i> ) | Marten ( <i>Martes americana</i> ) | Mink ( <i>Neovison vison</i> ) | River Otter ( <i>Lontra canadensis</i> ) | Wolverine ( <i>Gulo gulo</i> ) | Red squirrel ( <i>Sciurus vulgaris</i> ) | Caribou ( <i>Rangifer tarandus</i> ) | Deer ( <i>Odocoileus virginianus</i> ) | Moose ( <i>Alces alces</i> ) | Black bear ( <i>Ursus americanus</i> ) |   |
|-------------------|-------------------|---------------------|---------------------------------|----------------------------------|-----------------------------|---------------------------------|-------------------------------------------|-----------------------------------|------------------------------------|------------------------------------|--------------------------------|------------------------------------------|--------------------------------|------------------------------------------|--------------------------------------|----------------------------------------|------------------------------|----------------------------------------|---|
| Snow tracking     | Toews et al. 2018 | Linear              | Trail                           | 0                                | - ↓                         | 0                               | -                                         | -                                 | -                                  | -                                  | -                              | -                                        | -                              | -                                        | -                                    | 0                                      | 0                            | -                                      |   |
|                   |                   |                     | Seismic                         | 0                                | - ↑                         | 0                               | -                                         | -                                 | -                                  | -                                  | -                              | -                                        | -                              | -                                        | -                                    | -                                      | 0                            | 0                                      | - |
|                   |                   |                     | Road                            | ↑                                | - ↓                         | ↓                               | -                                         | -                                 | -                                  | -                                  | -                              | -                                        | -                              | -                                        | -                                    | -                                      | ↑                            | 0                                      | - |
|                   |                   | Polygonal           | Agriculture                     | ↑                                | - ↓                         | ↓                               | -                                         | -                                 | -                                  | -                                  | -                              | -                                        | -                              | -                                        | -                                    | -                                      | ↑                            | 0                                      | - |
|                   |                   |                     | Wellsite                        | ↑                                | -                           | 0                               | 0                                         | -                                 | -                                  | -                                  | -                              | -                                        | -                              | -                                        | -                                    | -                                      | 0                            | 0                                      | - |
|                   |                   |                     | Cutblock                        | 0                                | -                           | 0                               | 0                                         | -                                 | -                                  | -                                  | -                              | -                                        | -                              | -                                        | -                                    | -                                      | ↑                            | ↑                                      | - |
|                   | Total Anthro      |                     |                                 | ↑                                | - ↓                         | ↓                               | -                                         | -                                 | -                                  | -                                  | -                              | -                                        | -                              | -                                        | -                                    | ↑                                      | 0                            | -                                      |   |
|                   | Toews et al. 2017 | Linear              | Trail                           | 0                                | - ↓                         | 0                               | -                                         | -                                 | -                                  | -                                  | -                              | -                                        | -                              | -                                        | -                                    | -                                      | 0                            | 0                                      | - |
|                   |                   |                     | Seismic                         | 0                                | - ↑                         | 0                               | -                                         | -                                 | -                                  | -                                  | -                              | -                                        | -                              | -                                        | -                                    | -                                      | ↓                            | 0                                      | - |
|                   |                   |                     | Pipeline                        | ↑                                | - ↑                         | 0                               | -                                         | -                                 | -                                  | -                                  | -                              | -                                        | -                              | -                                        | -                                    | -                                      | 0                            | 0                                      | - |
| Transmission line |                   |                     | 0                               | -                                | 0                           | 0                               | -                                         | -                                 | -                                  | -                                  | -                              | -                                        | -                              | -                                        | -                                    | 0                                      | 0                            | -                                      |   |
| Road              |                   |                     | ↑                               | - ↓                              | 0                           | -                               | -                                         | -                                 | -                                  | -                                  | -                              | -                                        | -                              | -                                        | -                                    | ↑                                      | ↓                            | -                                      |   |
| Polygonal         |                   | Agriculture         | ↑                               | -                                | 0                           | ↓                               | -                                         | -                                 | -                                  | -                                  | -                              | -                                        | -                              | -                                        | -                                    | 0                                      | 0                            | -                                      |   |
|                   |                   | Wellsite            | ↑                               | -                                | 0                           | 0                               | -                                         | -                                 | -                                  | -                                  | -                              | -                                        | -                              | -                                        | -                                    | 0                                      | 0                            | -                                      |   |
|                   |                   | Cutblock (≤ 10 yr)  | 0                               | -                                | 0                           | 0                               | -                                         | -                                 | -                                  | -                                  | -                              | -                                        | -                              | -                                        | -                                    | ↑                                      | 0                            | -                                      |   |
|                   |                   | Cutblock (10-40 yr) | 0                               | -                                | 0                           | 0                               | -                                         | -                                 | -                                  | -                                  | -                              | -                                        | -                              | -                                        | -                                    | 0                                      | ↑                            | -                                      |   |
|                   |                   | Cutblock (> 40 yr)  | 0                               | -                                | 0                           | ↑                               | -                                         | -                                 | -                                  | -                                  | -                              | -                                        | -                              | -                                        | -                                    | 0                                      | 0                            | -                                      |   |
| Total Anthro      |                   |                     | ↑                               | - ↓                              | ↓                           | -                               | -                                         | -                                 | -                                  | -                                  | -                              | -                                        | -                              | -                                        | ↑                                    | 0                                      | -                            |                                        |   |
| Telemetry         | Linear            | Seismic line        | ↑                               | - ↑                              | -                           | -                               | -                                         | -                                 | -                                  | -                                  | -                              | -                                        | -                              | -                                        | -                                    | -                                      | -                            | -                                      |   |
|                   |                   | Pipeline            | ↑                               | - ↓                              | -                           | -                               | -                                         | -                                 | -                                  | -                                  | -                              | -                                        | -                              | -                                        | -                                    | -                                      | -                            | -                                      |   |
|                   |                   | Road                | ↑                               | - ↑                              | -                           | -                               | -                                         | -                                 | -                                  | -                                  | -                              | -                                        | -                              | -                                        | -                                    | -                                      | -                            | -                                      |   |
|                   | Polygonal         | Wellsite            | 0                               | -                                | 0                           | -                               | -                                         | -                                 | -                                  | -                                  | -                              | -                                        | -                              | -                                        | -                                    | -                                      | -                            | -                                      |   |
|                   |                   | Settlement          | ↑                               | - ↑                              | -                           | -                               | -                                         | -                                 | -                                  | -                                  | -                              | -                                        | -                              | -                                        | -                                    | -                                      | -                            | -                                      |   |
|                   |                   | Cutblocks (< 6 yr)  | 0                               | -                                | 0                           | -                               | -                                         | -                                 | -                                  | -                                  | -                              | -                                        | -                              | -                                        | -                                    | -                                      | -                            | -                                      |   |
|                   |                   | Cutblocks (6-30 yr) | 0                               | -                                | 0                           | -                               | -                                         | -                                 | -                                  | -                                  | -                              | -                                        | -                              | -                                        | -                                    | -                                      | -                            | -                                      |   |
|                   |                   | Cutblocks (> 30 yr) | 0                               | -                                | 0                           | -                               | -                                         | -                                 | -                                  | -                                  | -                              | -                                        | -                              | -                                        | -                                    | -                                      | -                            | -                                      |   |
|                   |                   | Other human         | ↓                               | -                                | 0                           | -                               | -                                         | -                                 | -                                  | -                                  | -                              | -                                        | -                              | -                                        | -                                    | -                                      | -                            | -                                      |   |

## REFERENCES

- Dickie M, Serrouya R, McNay RS, Boutin S. 2017. Faster and farther: wolf movement on linear features and implications for hunting behaviour. du Toit J, editor. *J Appl Ecol.* 54(1):253–263. doi:10.1111/1365-2664.12732.
- Fisher JT, Burton AC. 2018. Wildlife winners and losers in an oil sands landscape. *Frontiers in Ecology and the Environment.* 16(6):323–328. doi:10.1002/fee.1807.
- Fisher JT, Burton AC, Nolan L, Roy L. 2020. Influences of landscape change and winter severity on invasive ungulate persistence in the Nearctic boreal forest. *Sci Rep.* 10(1):1–11. doi:10.1038/s41598-020-65385-3.
- Latham ADM, Latham MC, Boyce MS, Boutin S. 2011a. Movement responses by wolves to industrial linear features and their effect on woodland caribou in northeastern Alberta. *Ecol Appl.* 21(8):2854–2865. doi:10.1890/11-0666.1.
- Latham ADM, Latham MC, Boyce MS. 2011b. Habitat selection and spatial relationships of black bears (*Ursus americanus*) with woodland caribou (*Rangifer tarandus caribou*) in northeastern Alberta. *Can J Zool.* 89(4):267–277. doi:10.1139/z10-115.
- Latham ADM, Latham MC, Boyce MS, Boutin S. 2013. Spatial relationships of sympatric wolves (*Canis lupus*) and coyotes (*C. latrans*) with woodland caribou (*Rangifer tarandus caribou*) during the calving season in a human-modified boreal landscape. *Wildl Res.* 40(3):250–260. doi:10.1071/WR12184.
- Tattersall, E. R., Burgar, J. M., Fisher, J. T., & Burton, A. C. (2019). Boreal predator co-occurrences reveal shared use of seismic lines in a working landscape. *Ecology and Evolution*, 10(3), 1678–1691. doi:10.1002/ece3.6028.
- Tigner J, Bayne EM, Boutin S. 2014. Black bear use of seismic lines in Northern Canada. *J Wildl Manage.* 78(2):282–292. doi:10.1002/jwmg.664.
- Tigner J, Bayne EM, Boutin S. 2015. American Marten Respond to Seismic Lines in Northern Canada at Two Spatial Scales. *PLOS ONE.* 10(3):e0118720. doi:10.1371/journal.pone.0118720.
- Toews M, Juanes F, Burton AC. 2017. Mammal responses to human footprint vary with spatial extent but not with spatial grain. *Ecosphere.* 8(3). doi:10.1002/ecs2.1735.
- Toews M, Juanes F, Burton AC. 2018. Mammal responses to the human footprint vary across species and stressors. *Journal of Environmental Management.* 217:690–699. doi:10.1016/j.jenvman.2018.04.009.
- Wasser SK, Keim JL, Taper ML, Lele SR. 2011. The influences of wolf predation, habitat loss, and human activity on caribou and moose in the Alberta oil sands. *Frontiers in Ecology and the Environment.* 9(10):546–551. doi:10.1890/100071.
